# Supplementary material for: Use of fermented spent coffee grounds as a substrate supplement for rearing black soldier fly larvae, Hermetia illucens (L), (Diptera: Stratiomyidae)
Source: PeerJ journal article supplement (doi:10.7717/peerj.14340), 2022-10-31
Supplement: BSF_stock_colony_images-credit.pdf [file BSF_stock_colony_images-credit.pdf]

Photo credit: Anchana Thancharoen



**BSF stock colony images**

**@ KU BSF FARM, THAILAND**

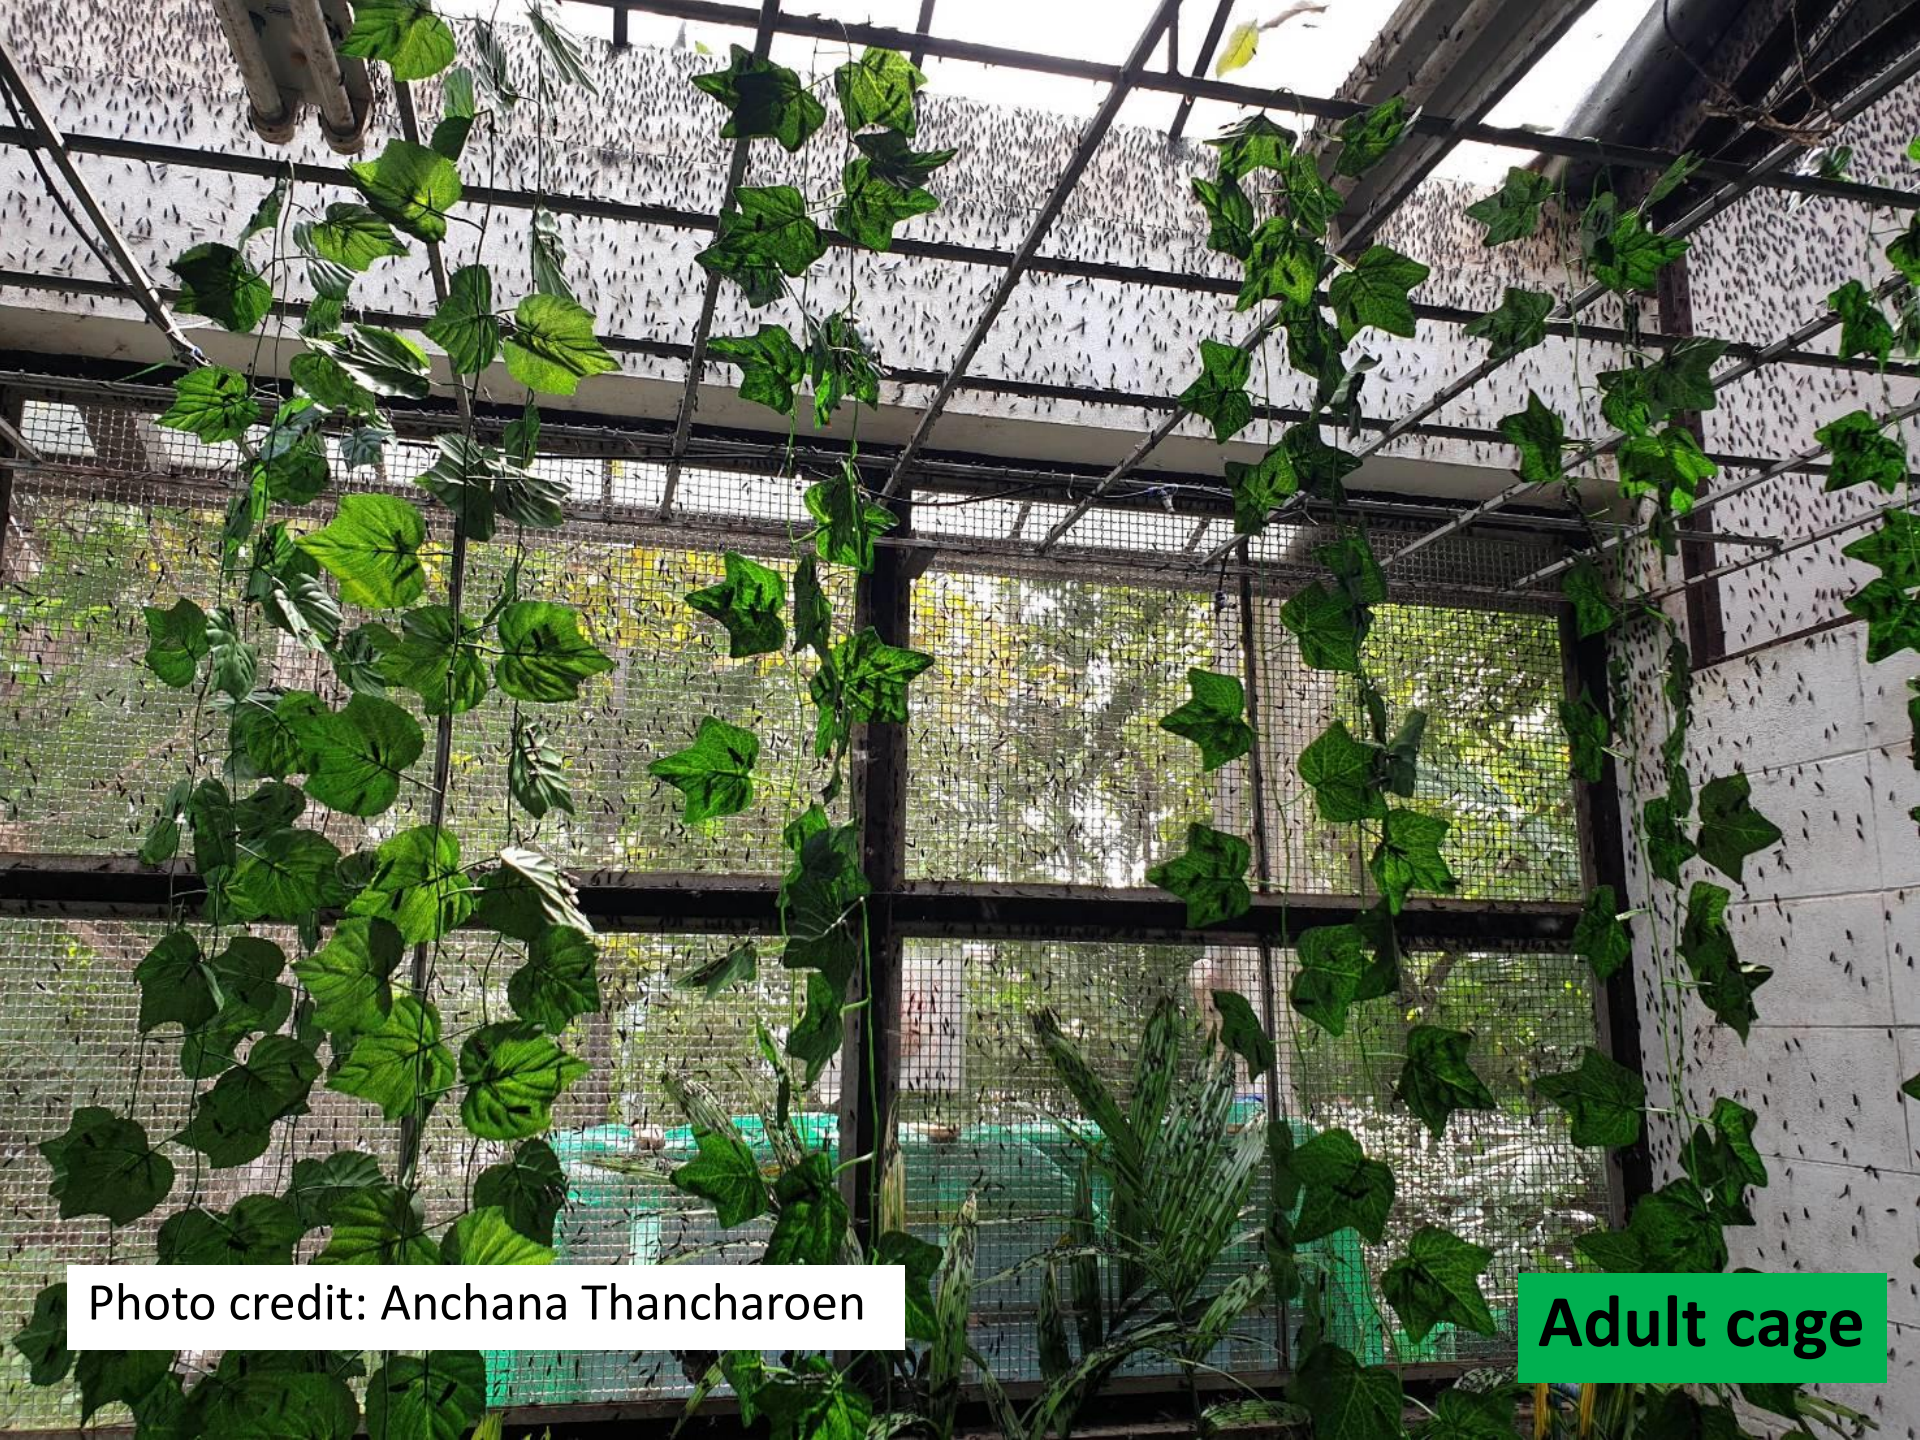

Photo credit: Anchana Thancharoen

**Adult cage**

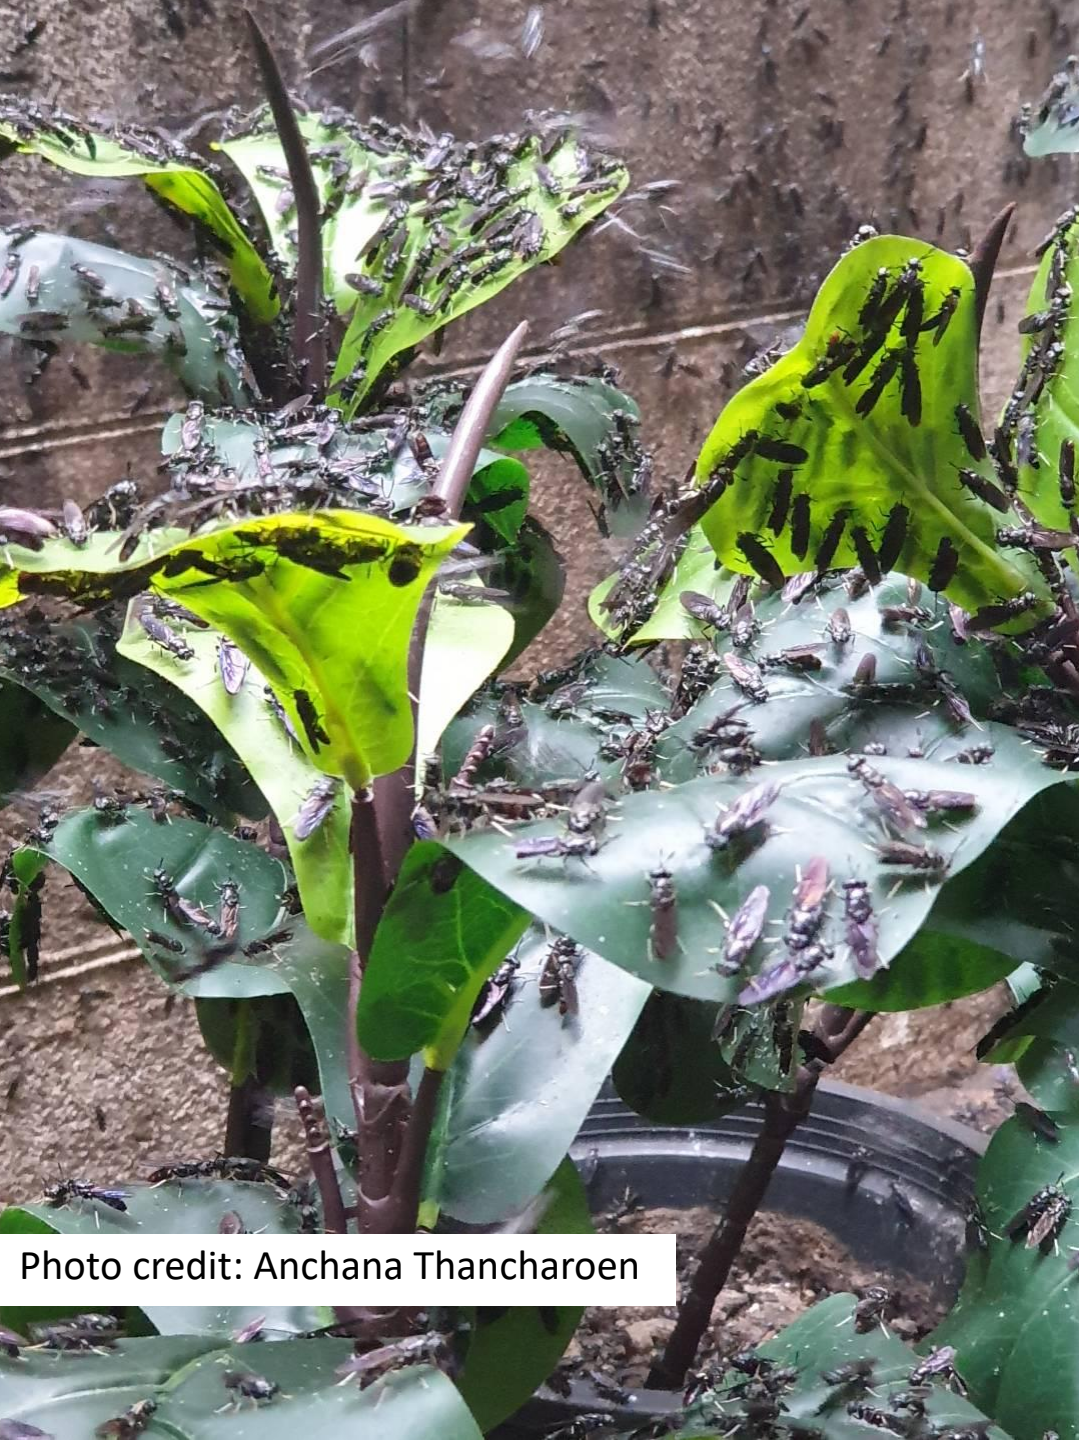

Photo credit: Anchana Thancharoen

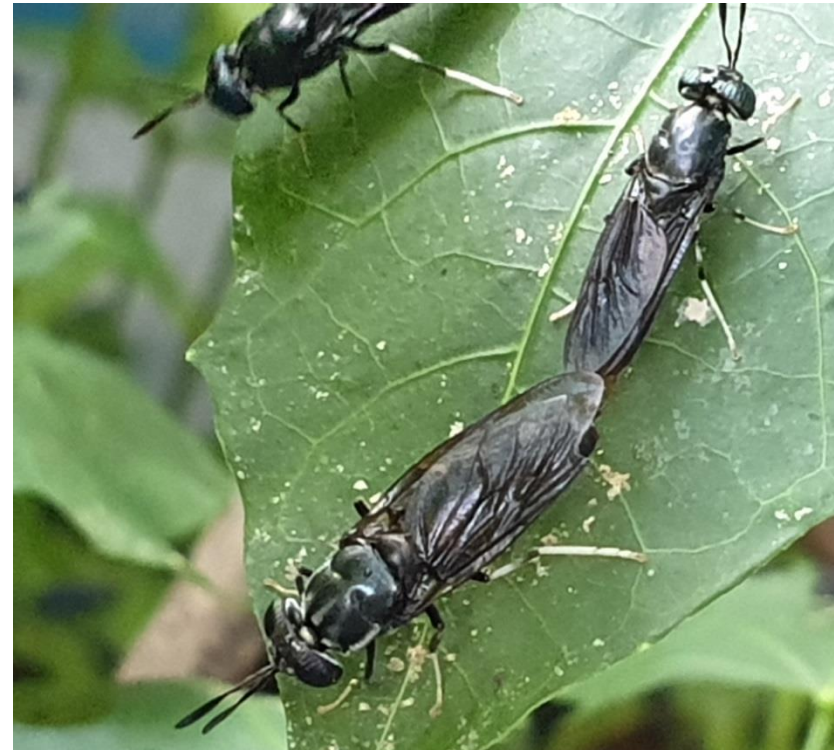

Photo credit: Anchana Thancharoen

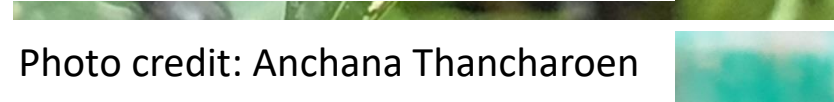

Photo credit: Anchana Thancharoen

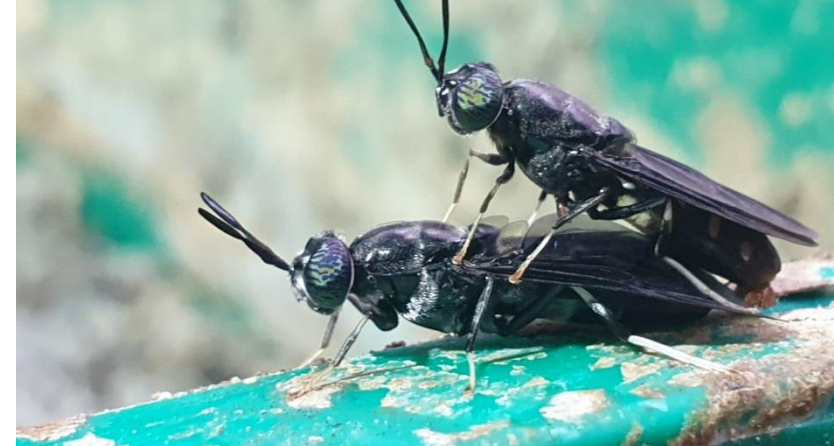

Photo credit: Anchana Thancharoen

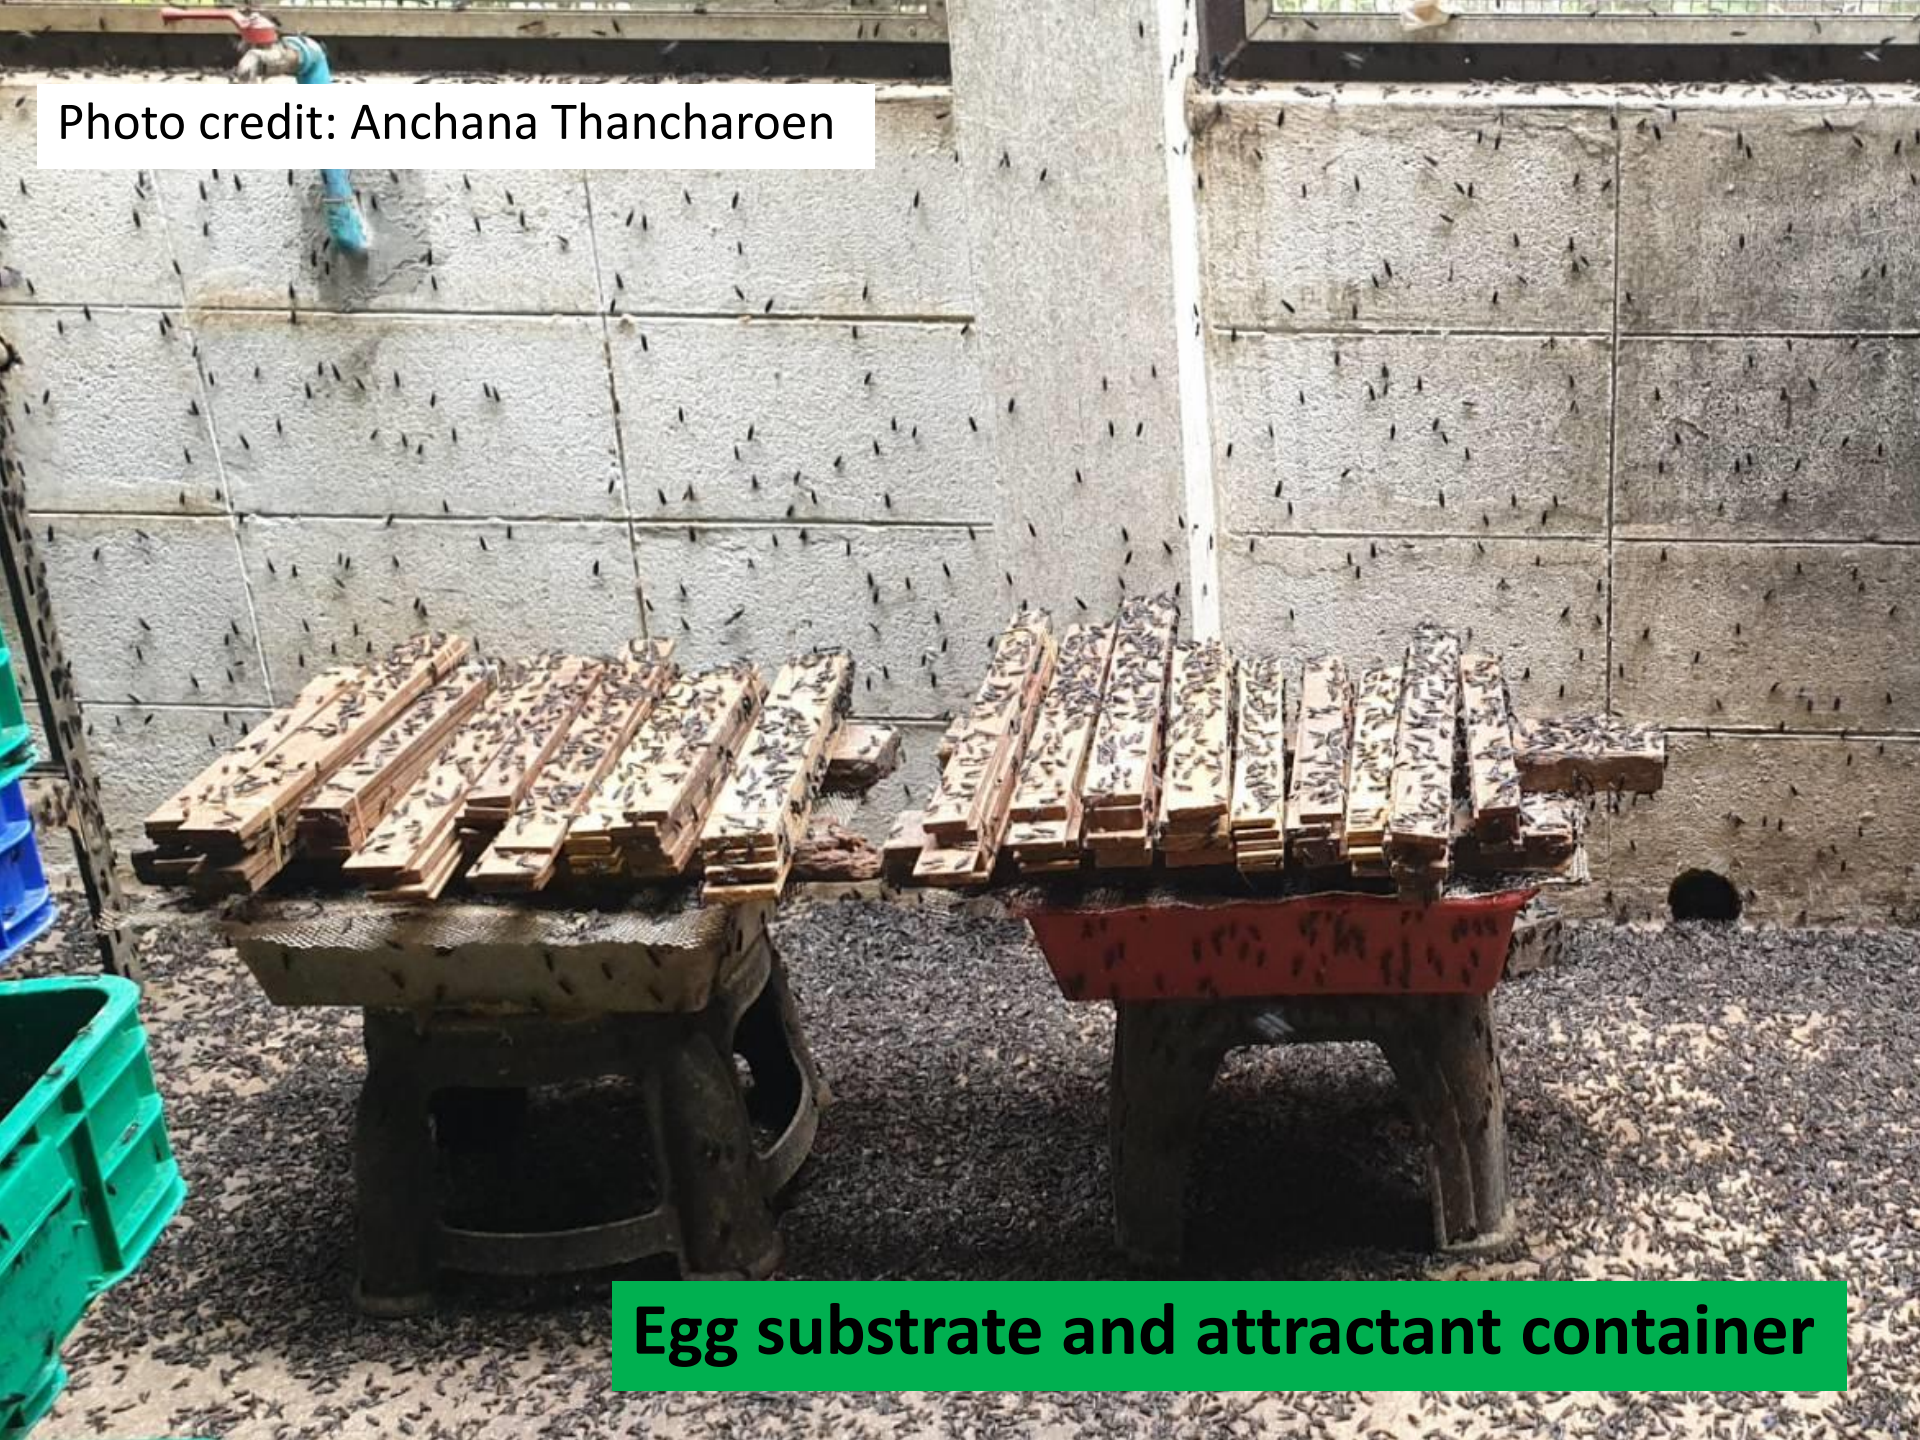

**Egg substrate and attractant container**

Photo credit: Anchana Thancharoen

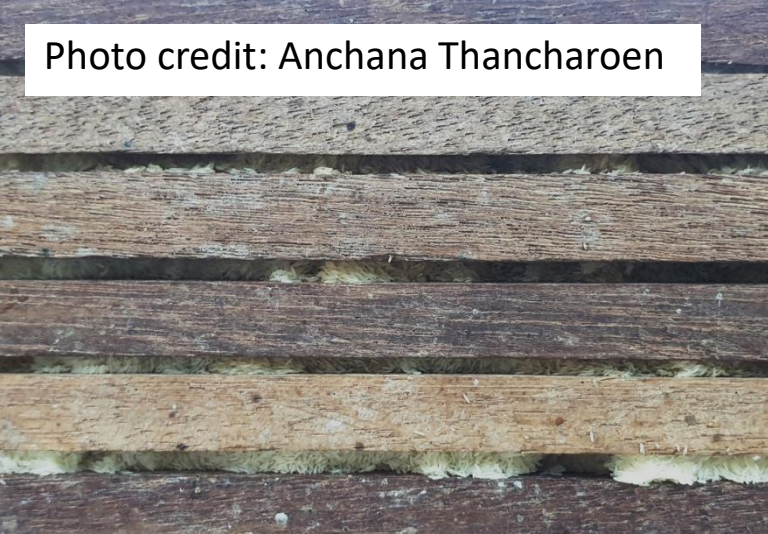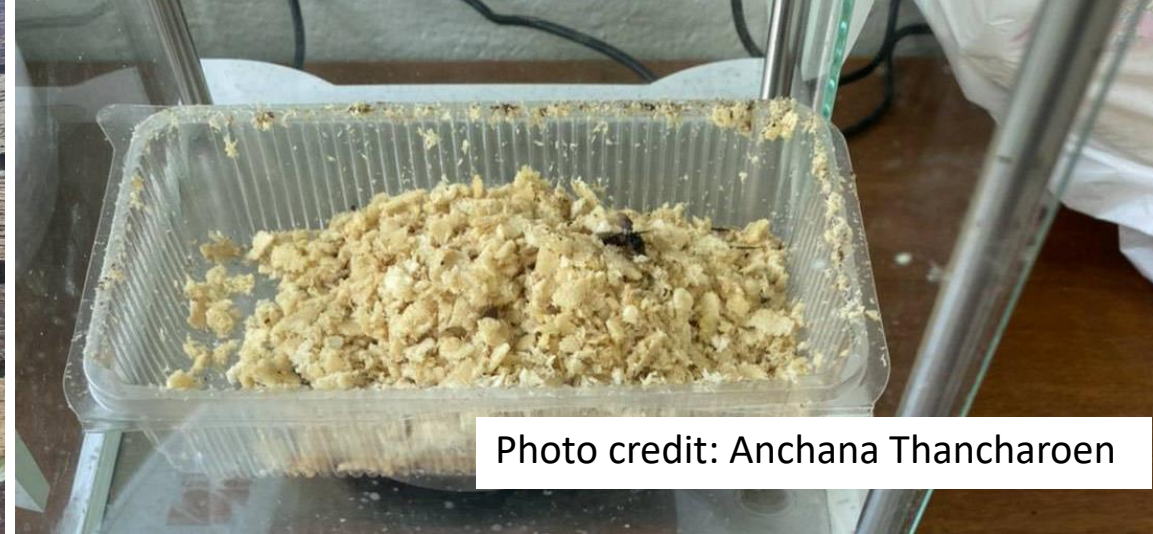

Photo credit: Anchana Thancharoen

Photo credit: Anchana Thancharoen

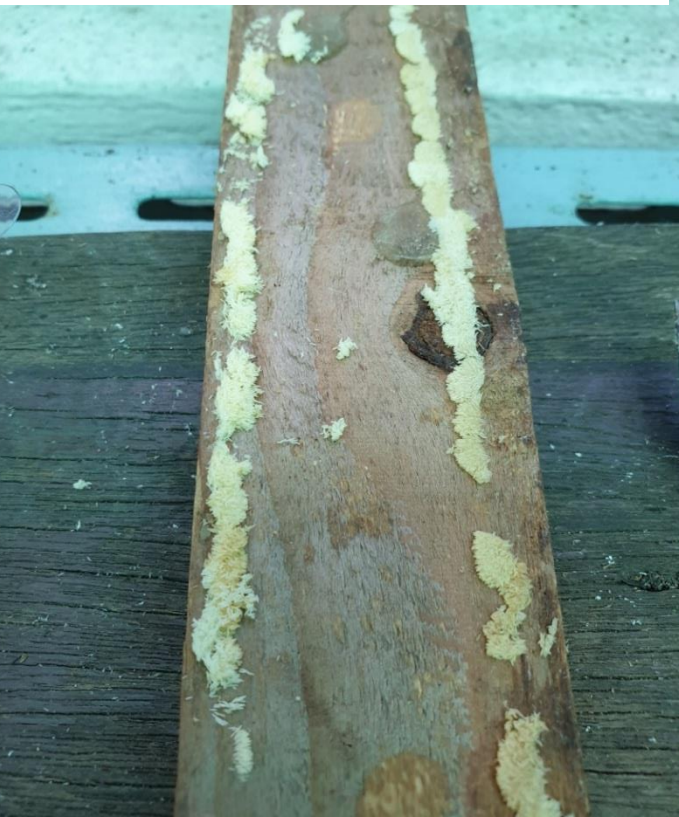

Photo credit: Anchana Thancharoen

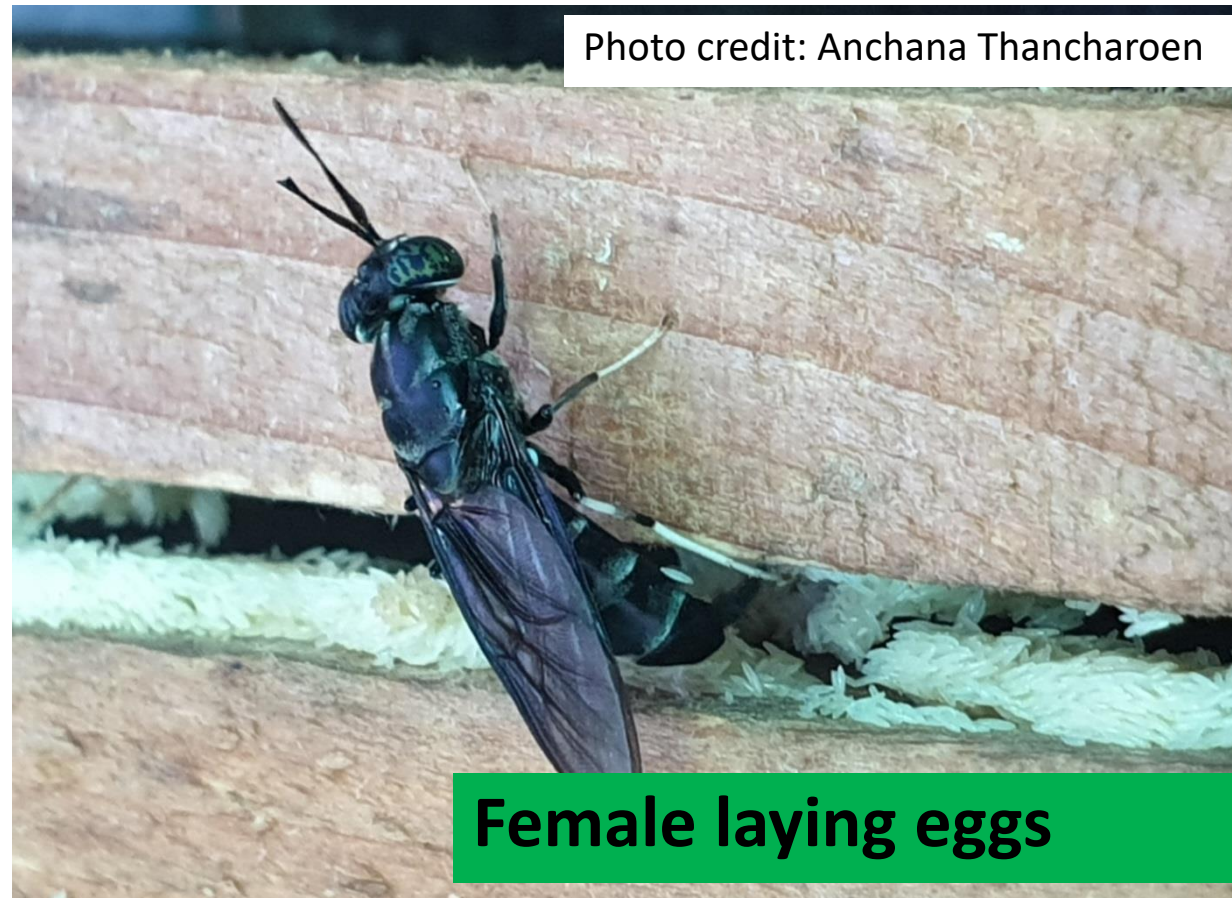

**Female laying eggs**

Photo credit: Anchana Thancharoen

Containers with BSF pupae

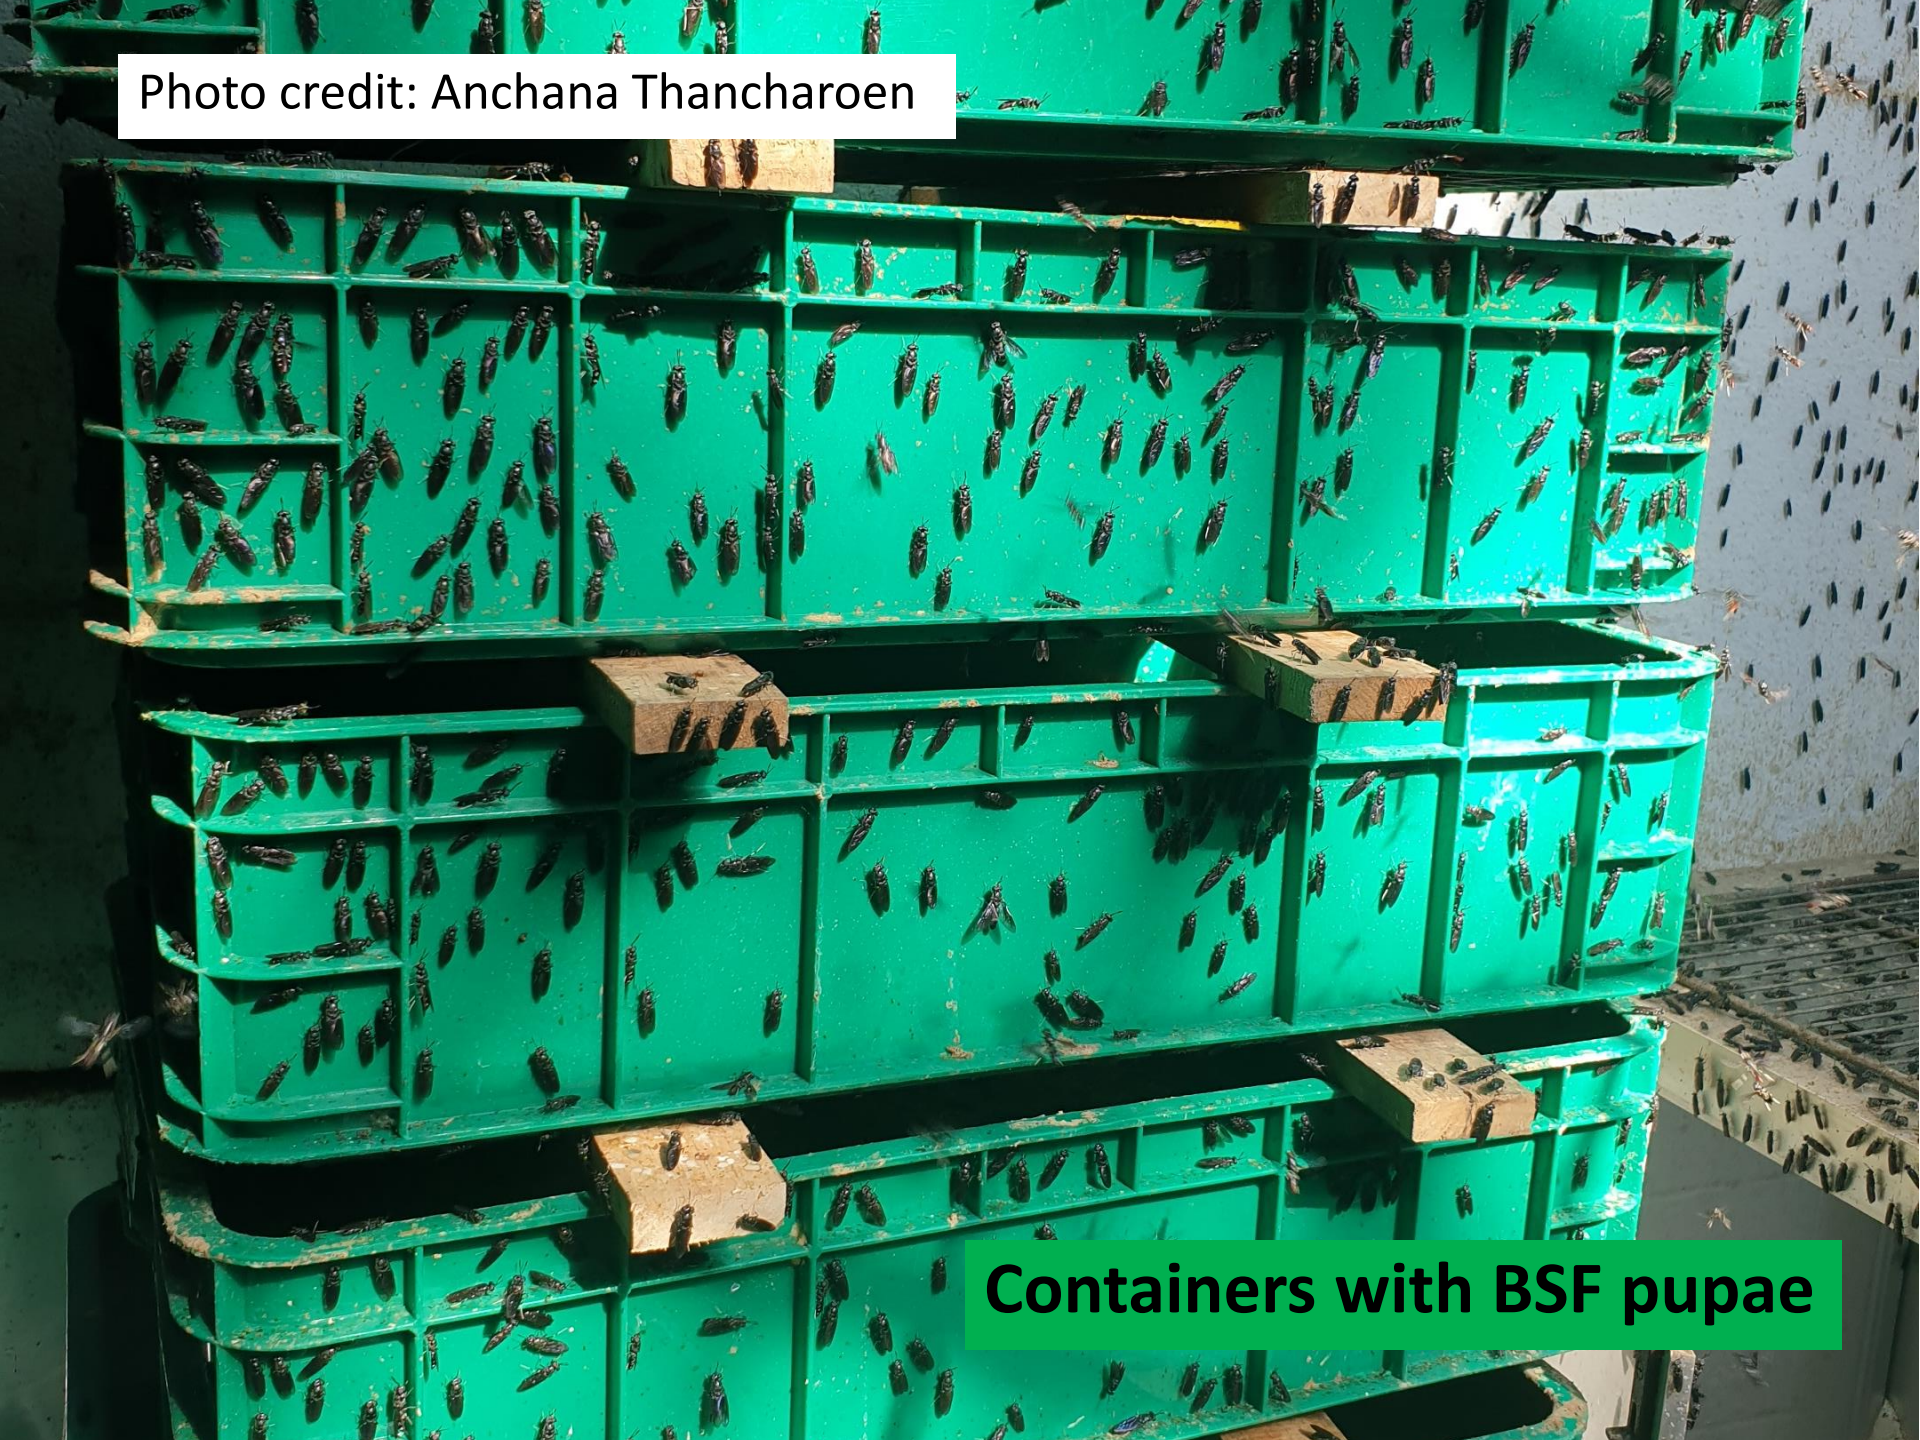

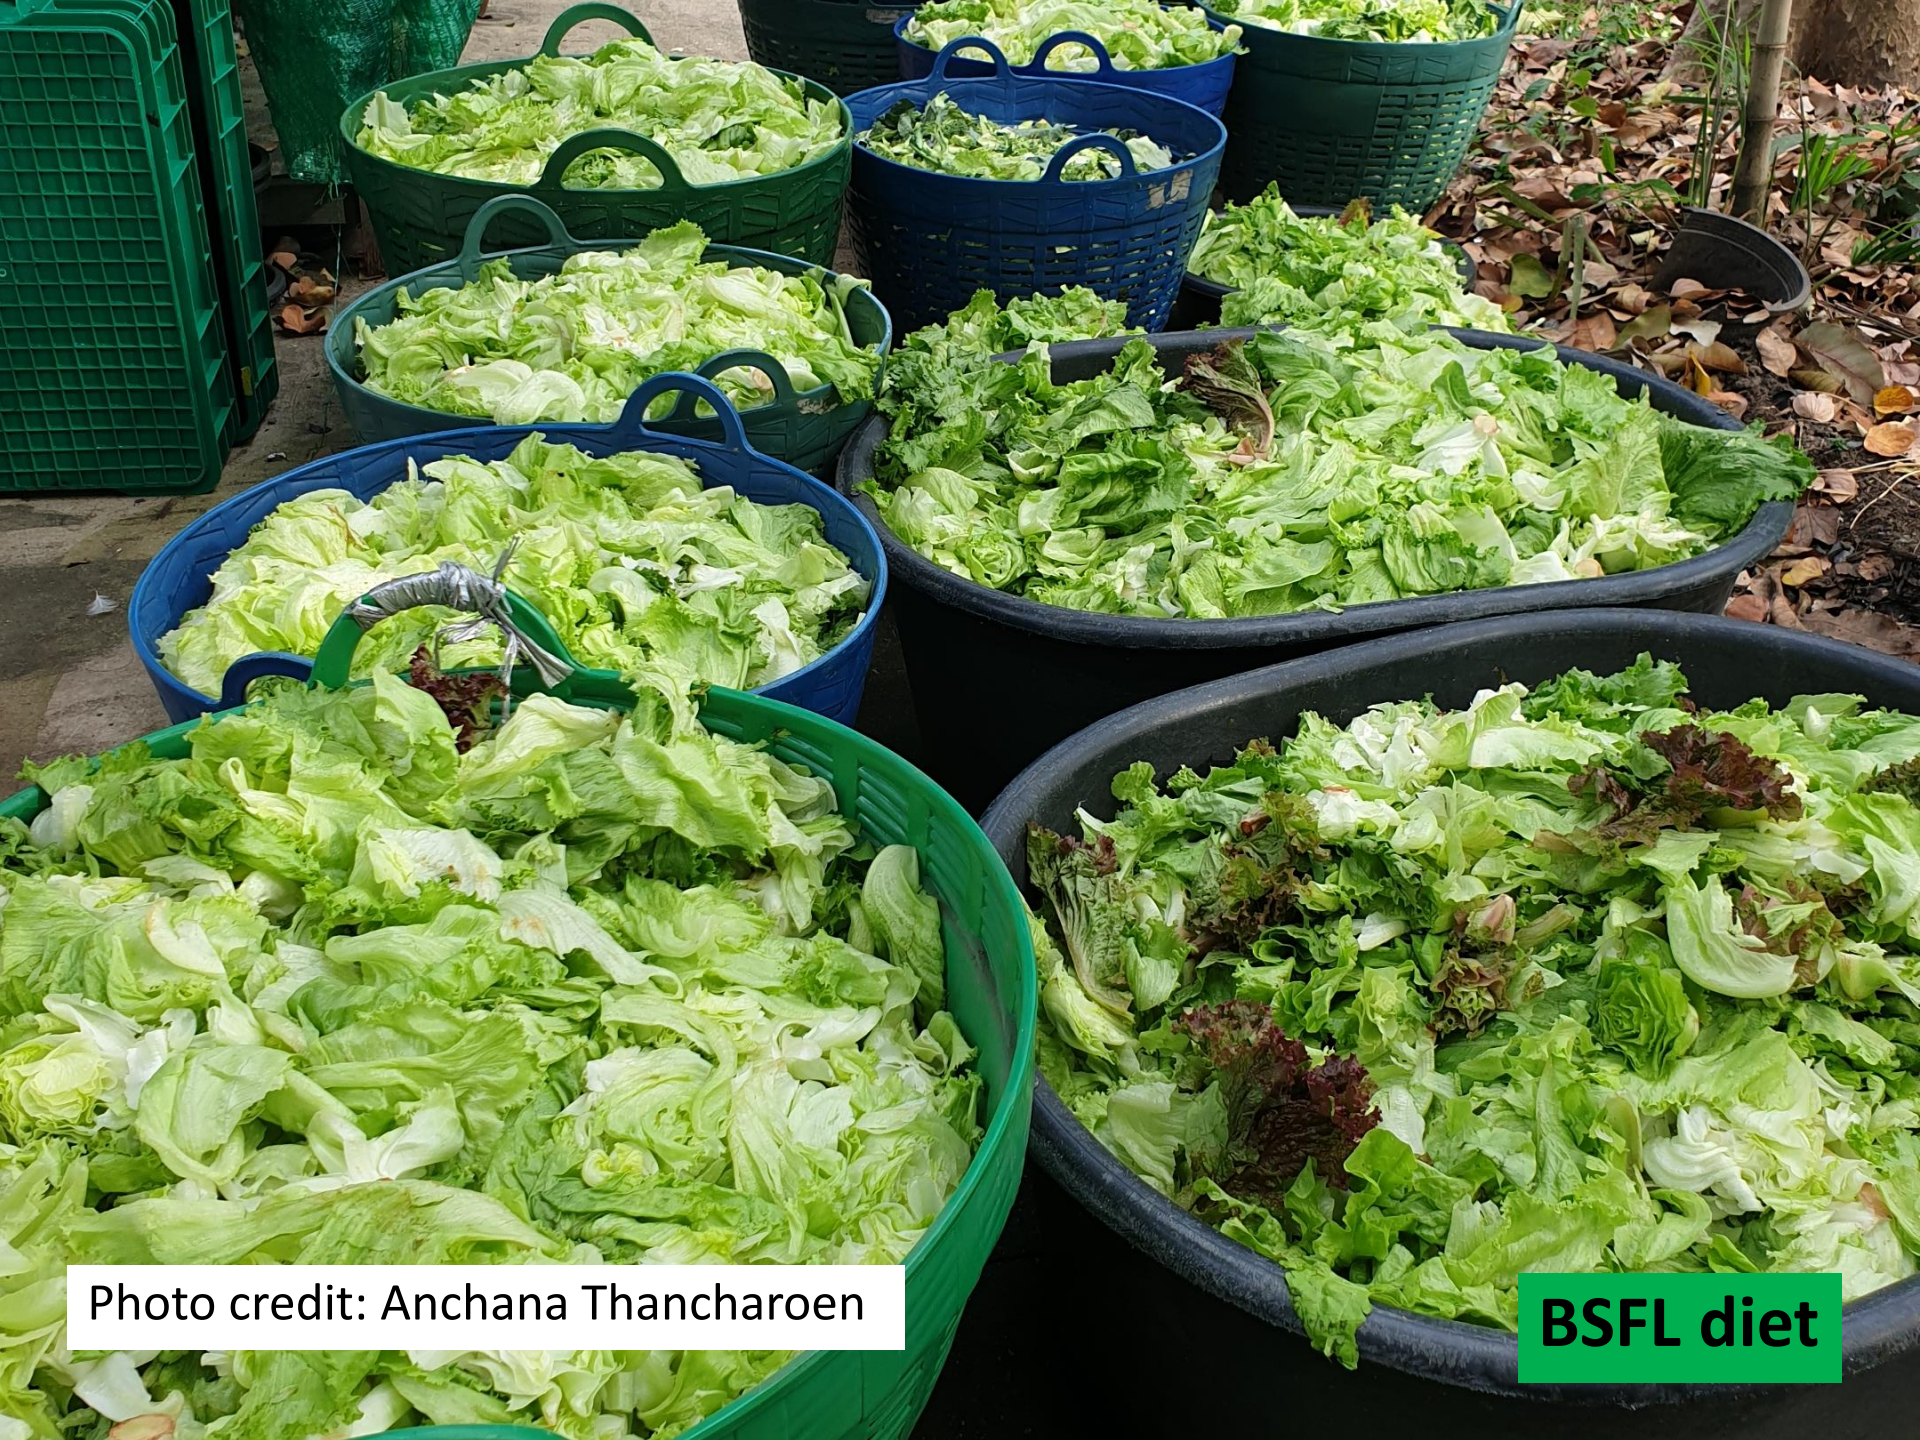

Photo credit: Anchana Thancharoen

**BSFL diet**

Photo credit: Anchana Thancharoen

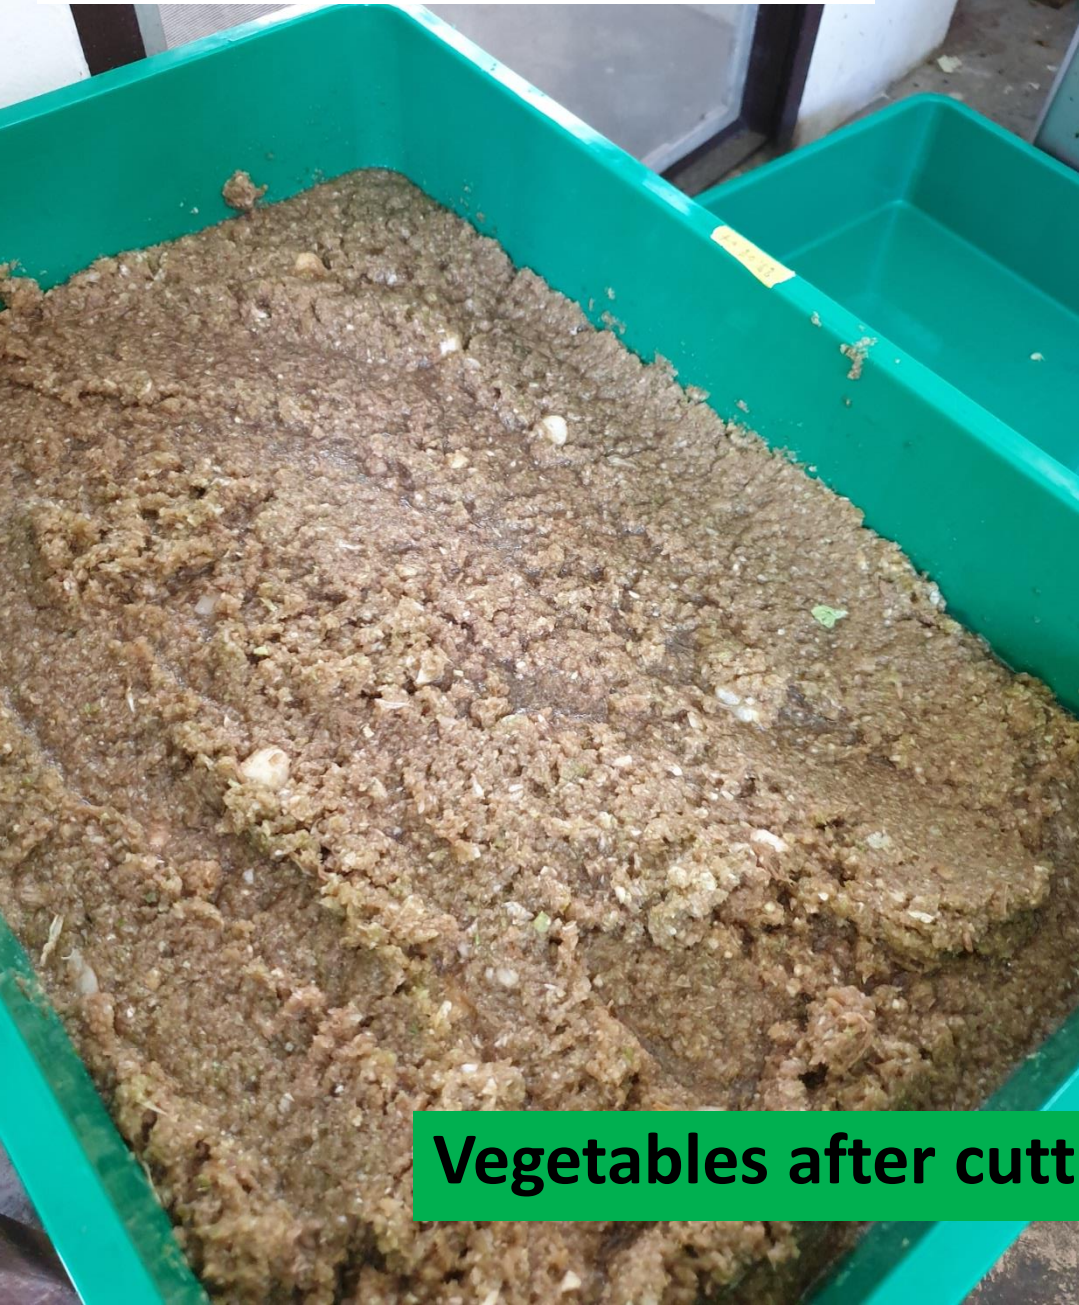

Photo credit: Anchana Thancharoen

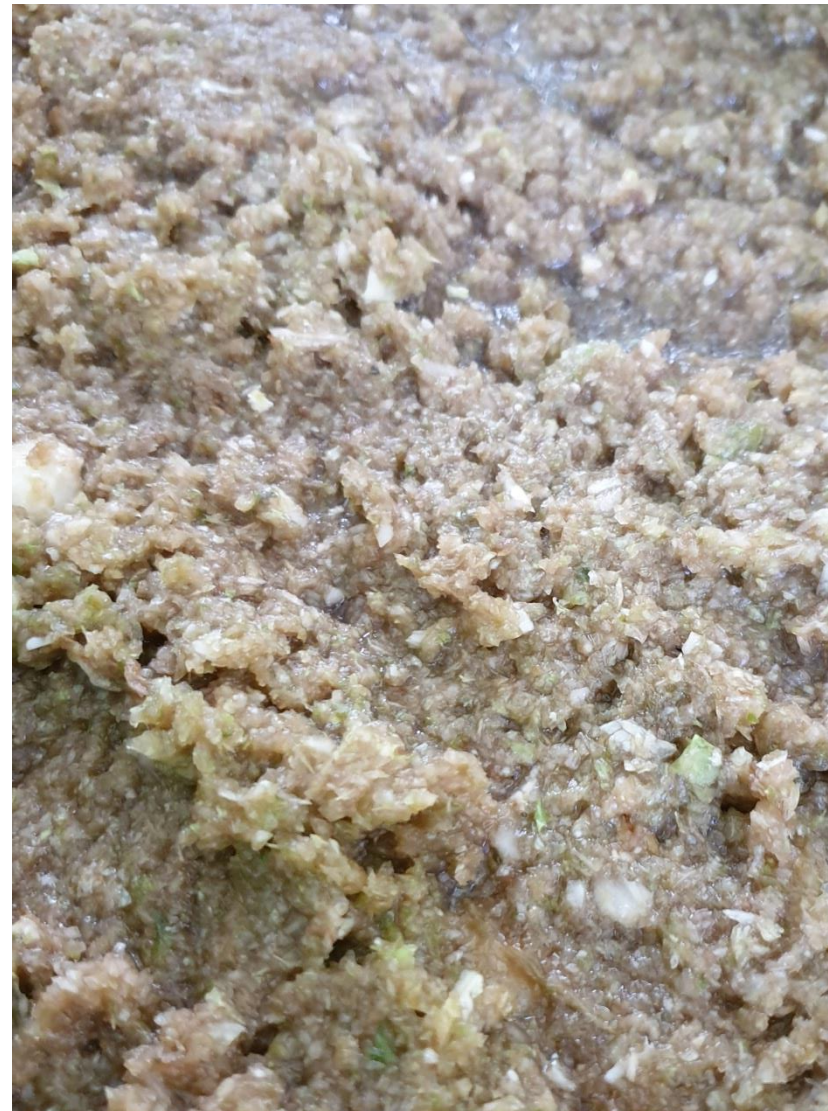

**Vegetables after cutting by a chopping machine**

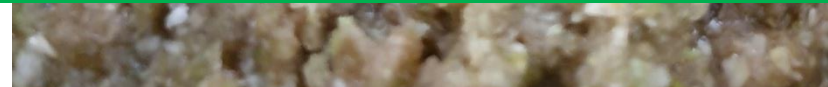



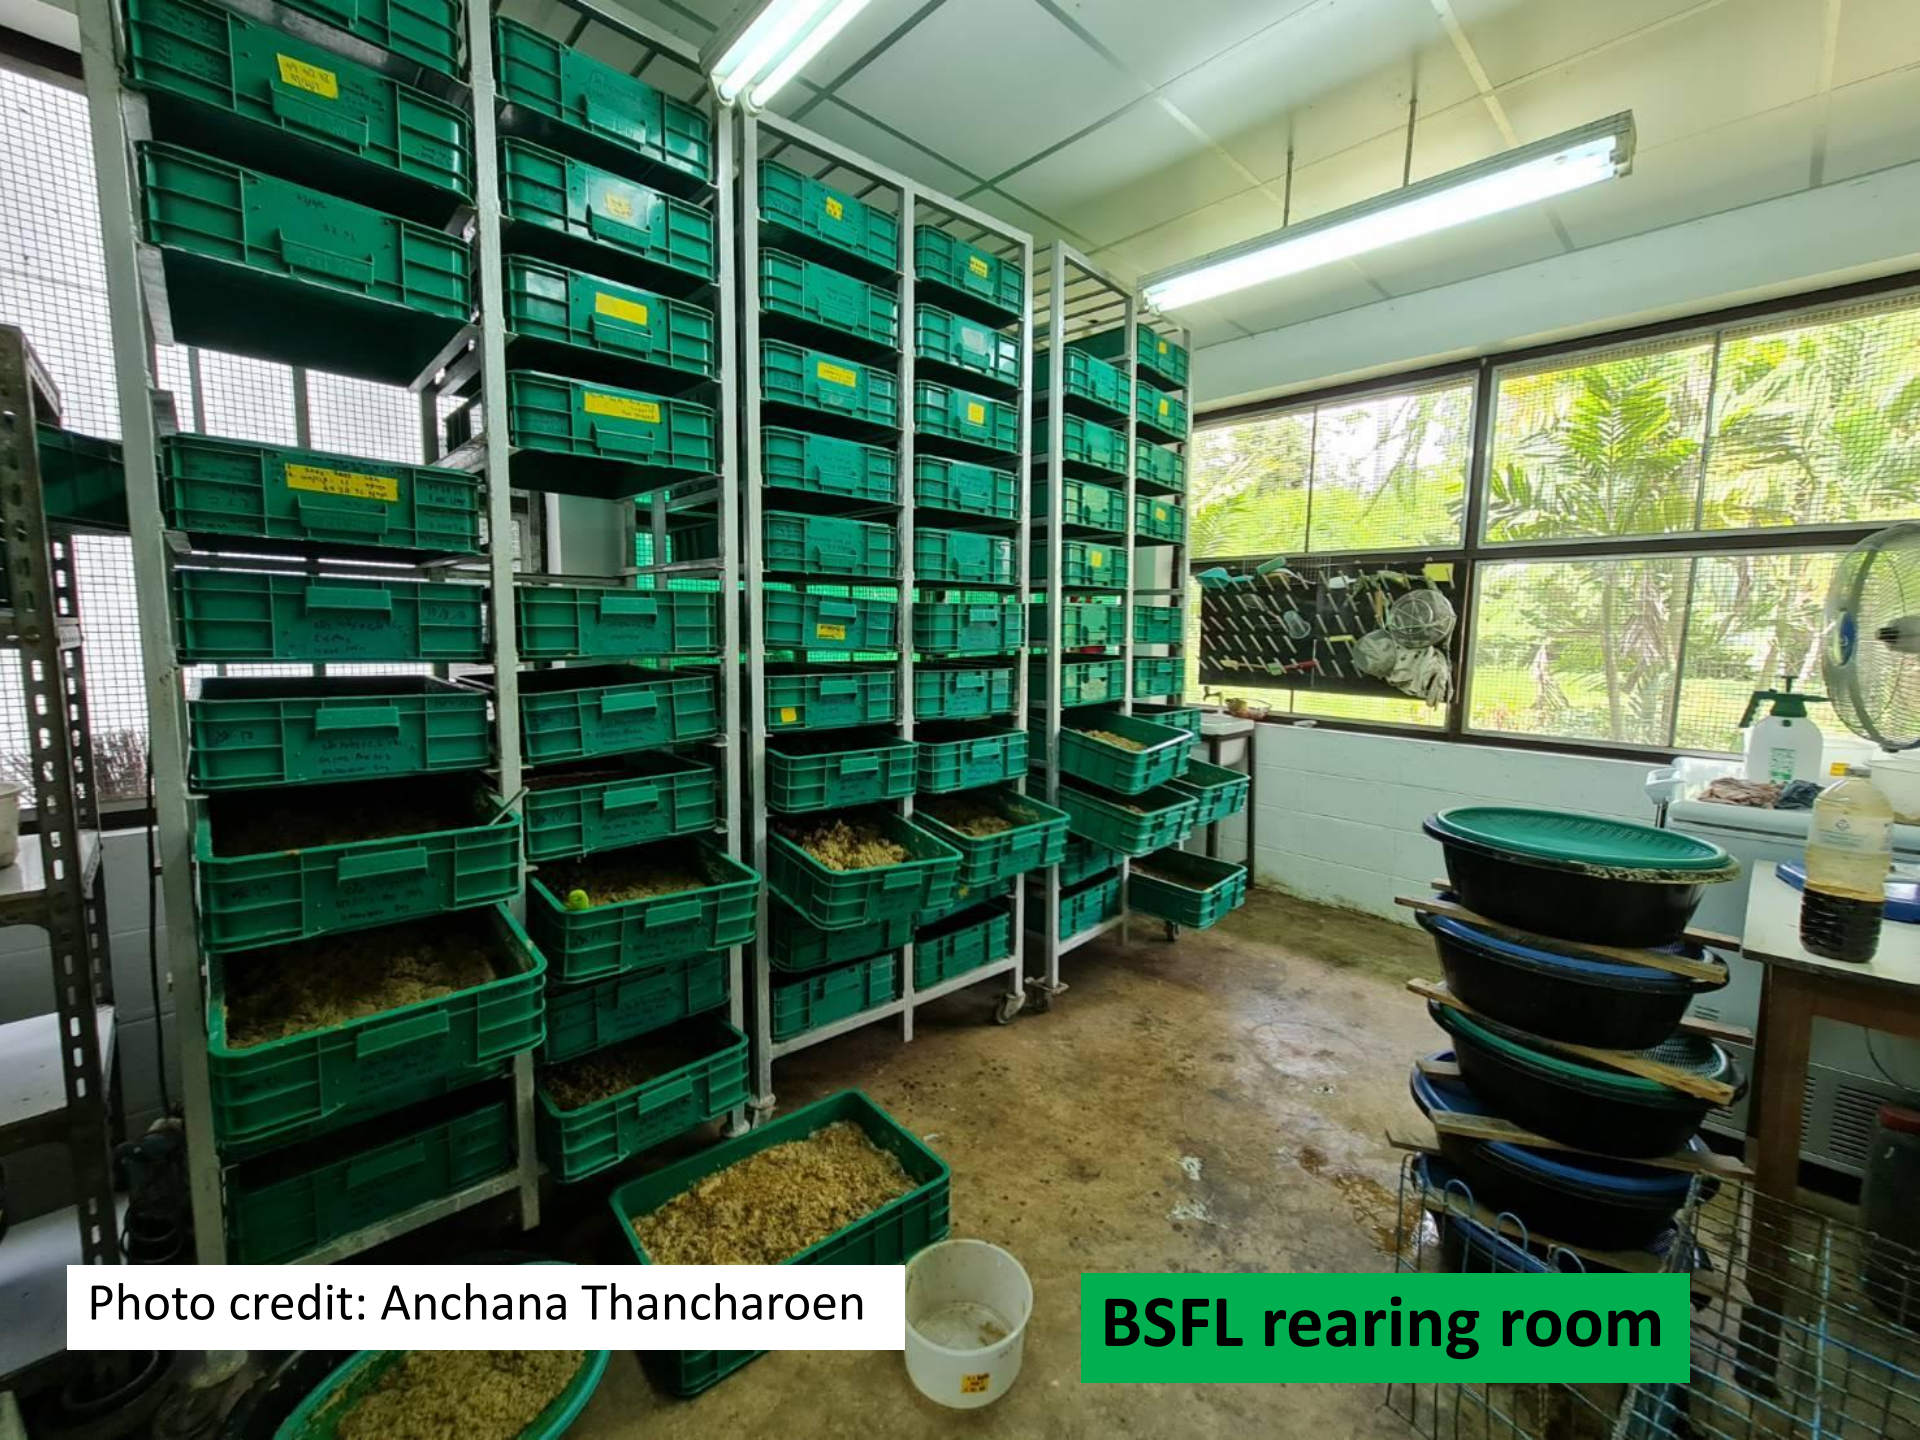

Photo credit: Anchana Thancharoen

**BSFL rearing room**

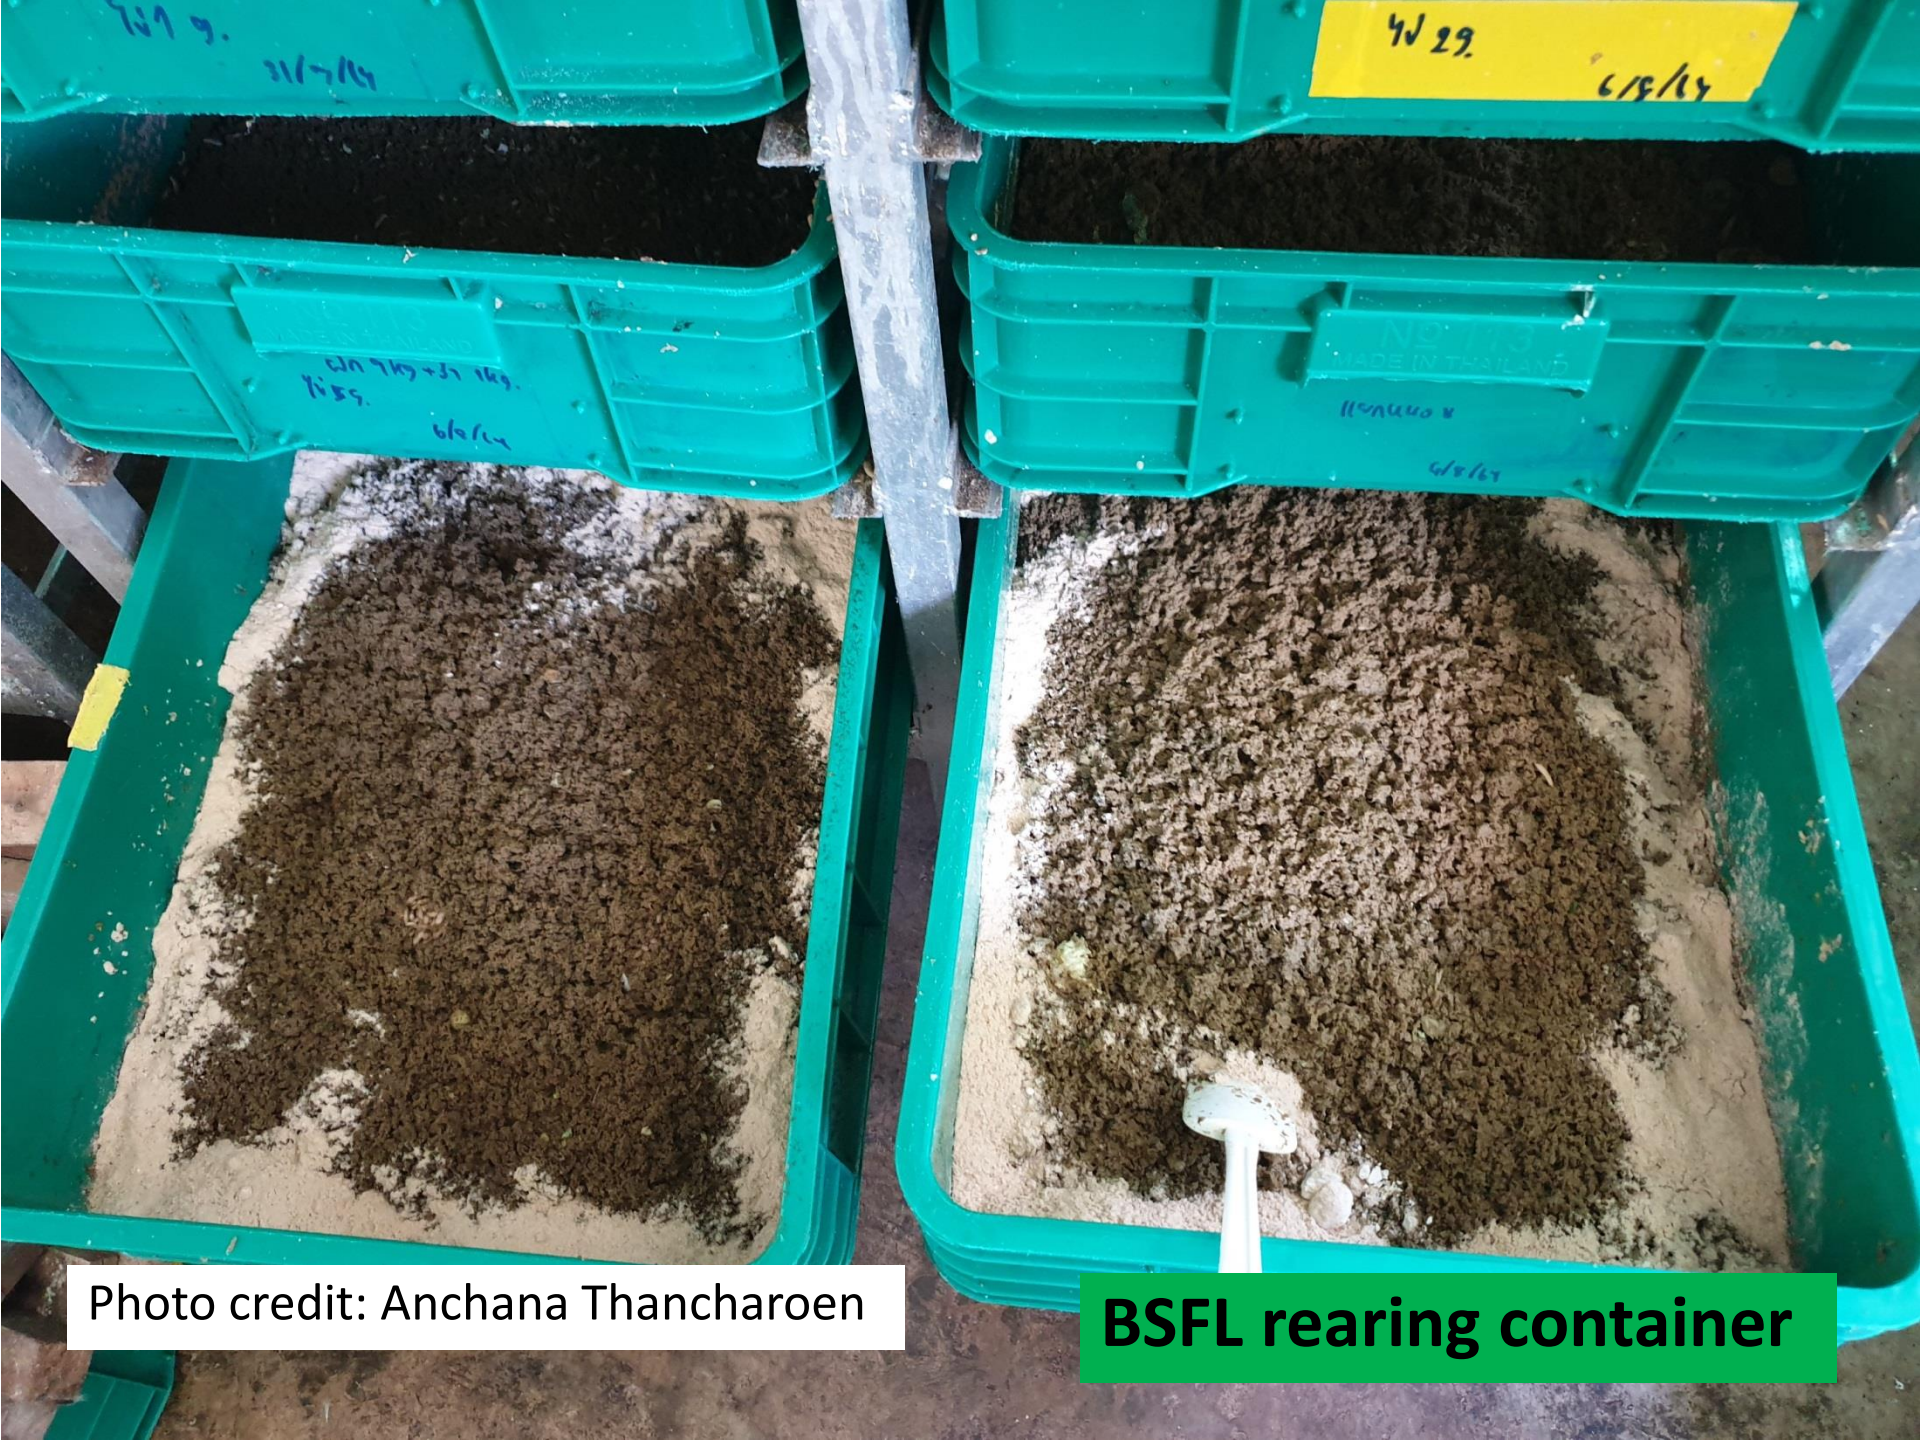

Photo credit: Anchana Thancharoen

**BSFL rearing container**

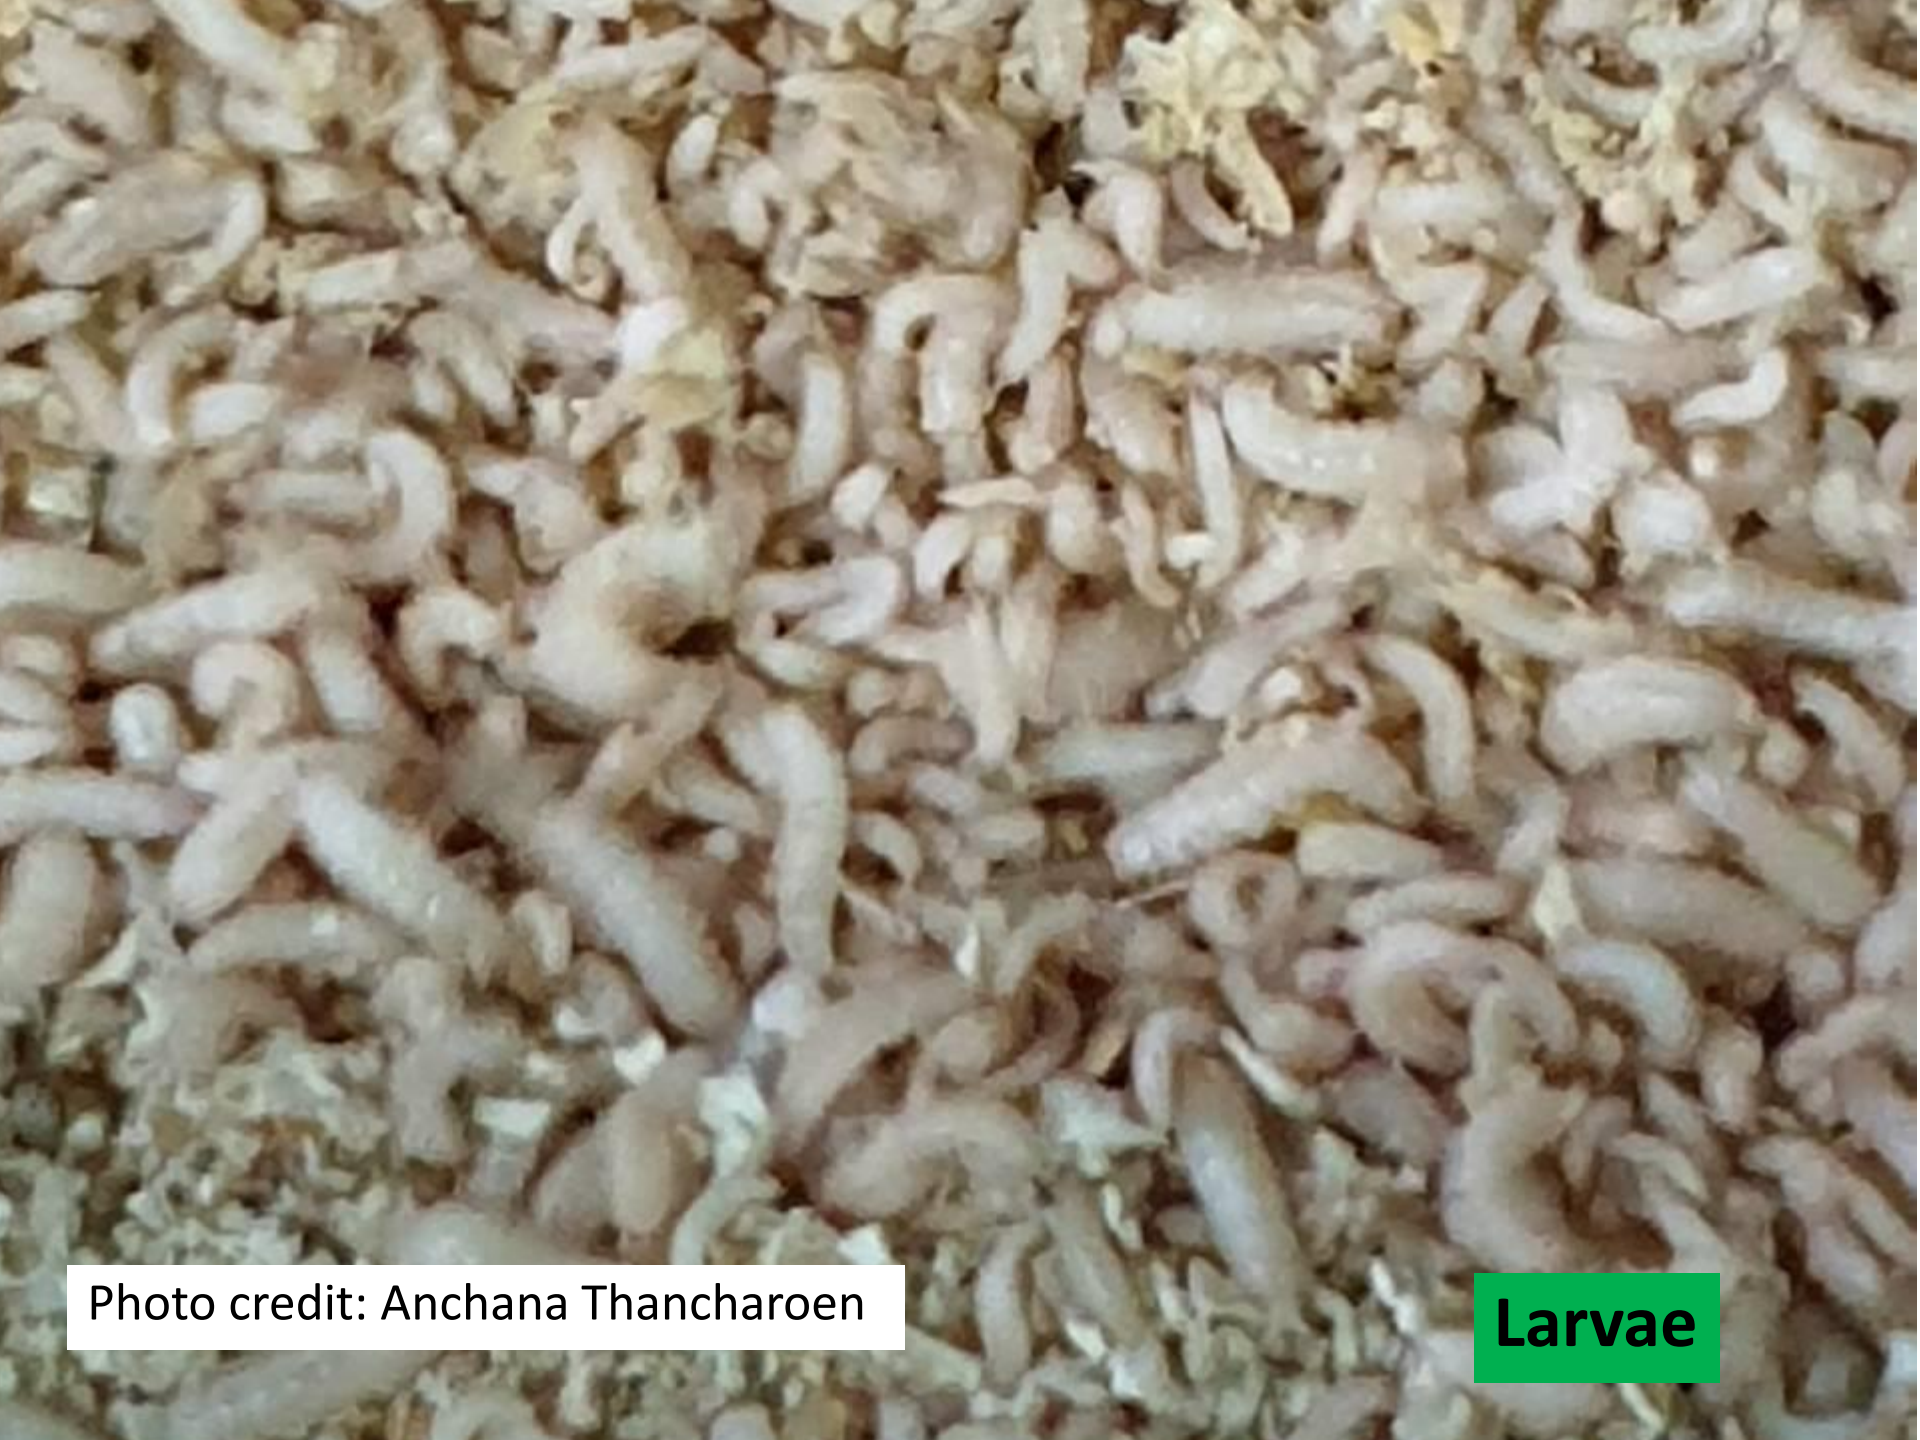

Photo credit: Anchana Thancharoen

**Larvae**

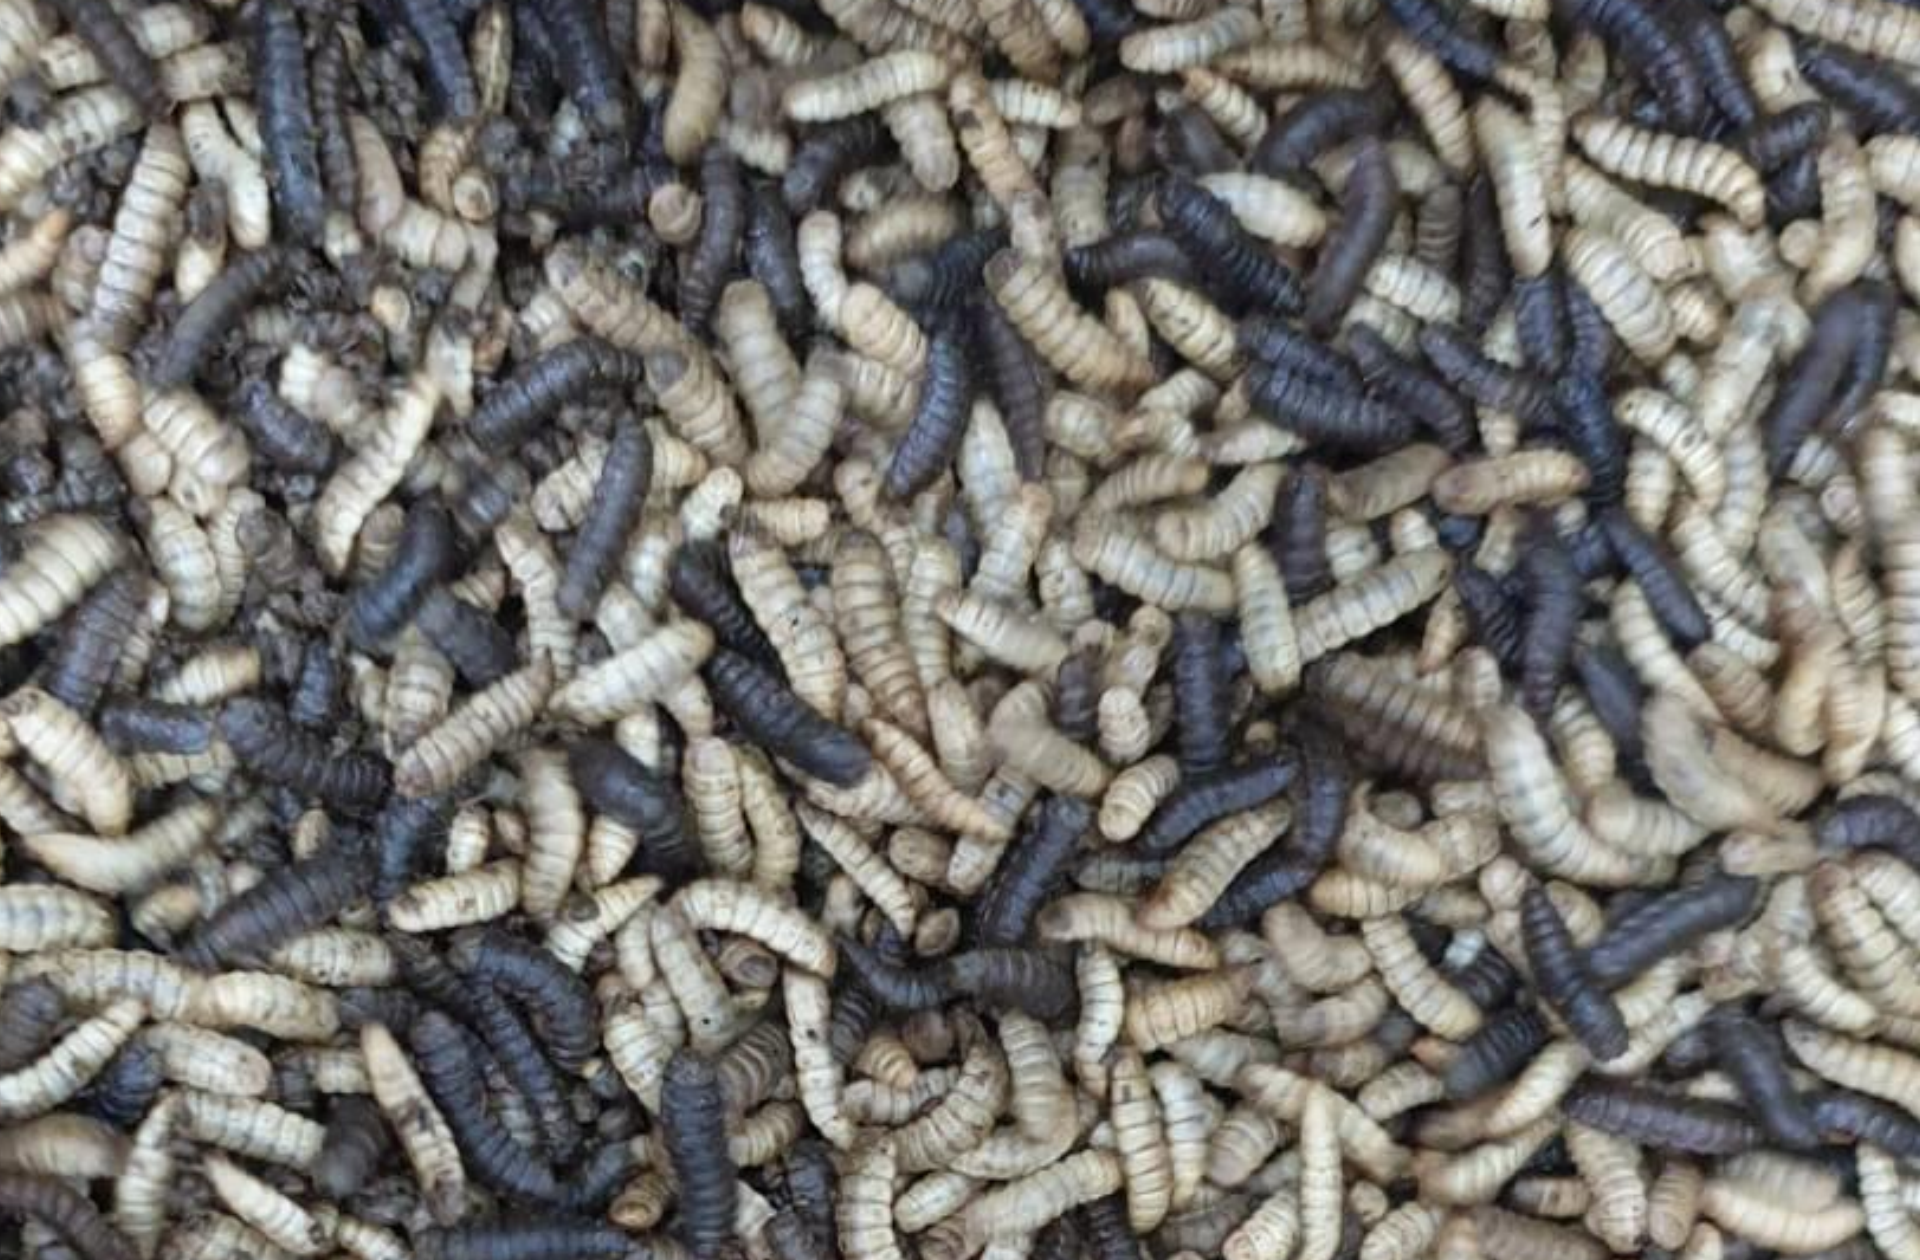

Photo credit: Anchana Thancharoen

**Larvae and prepupae**

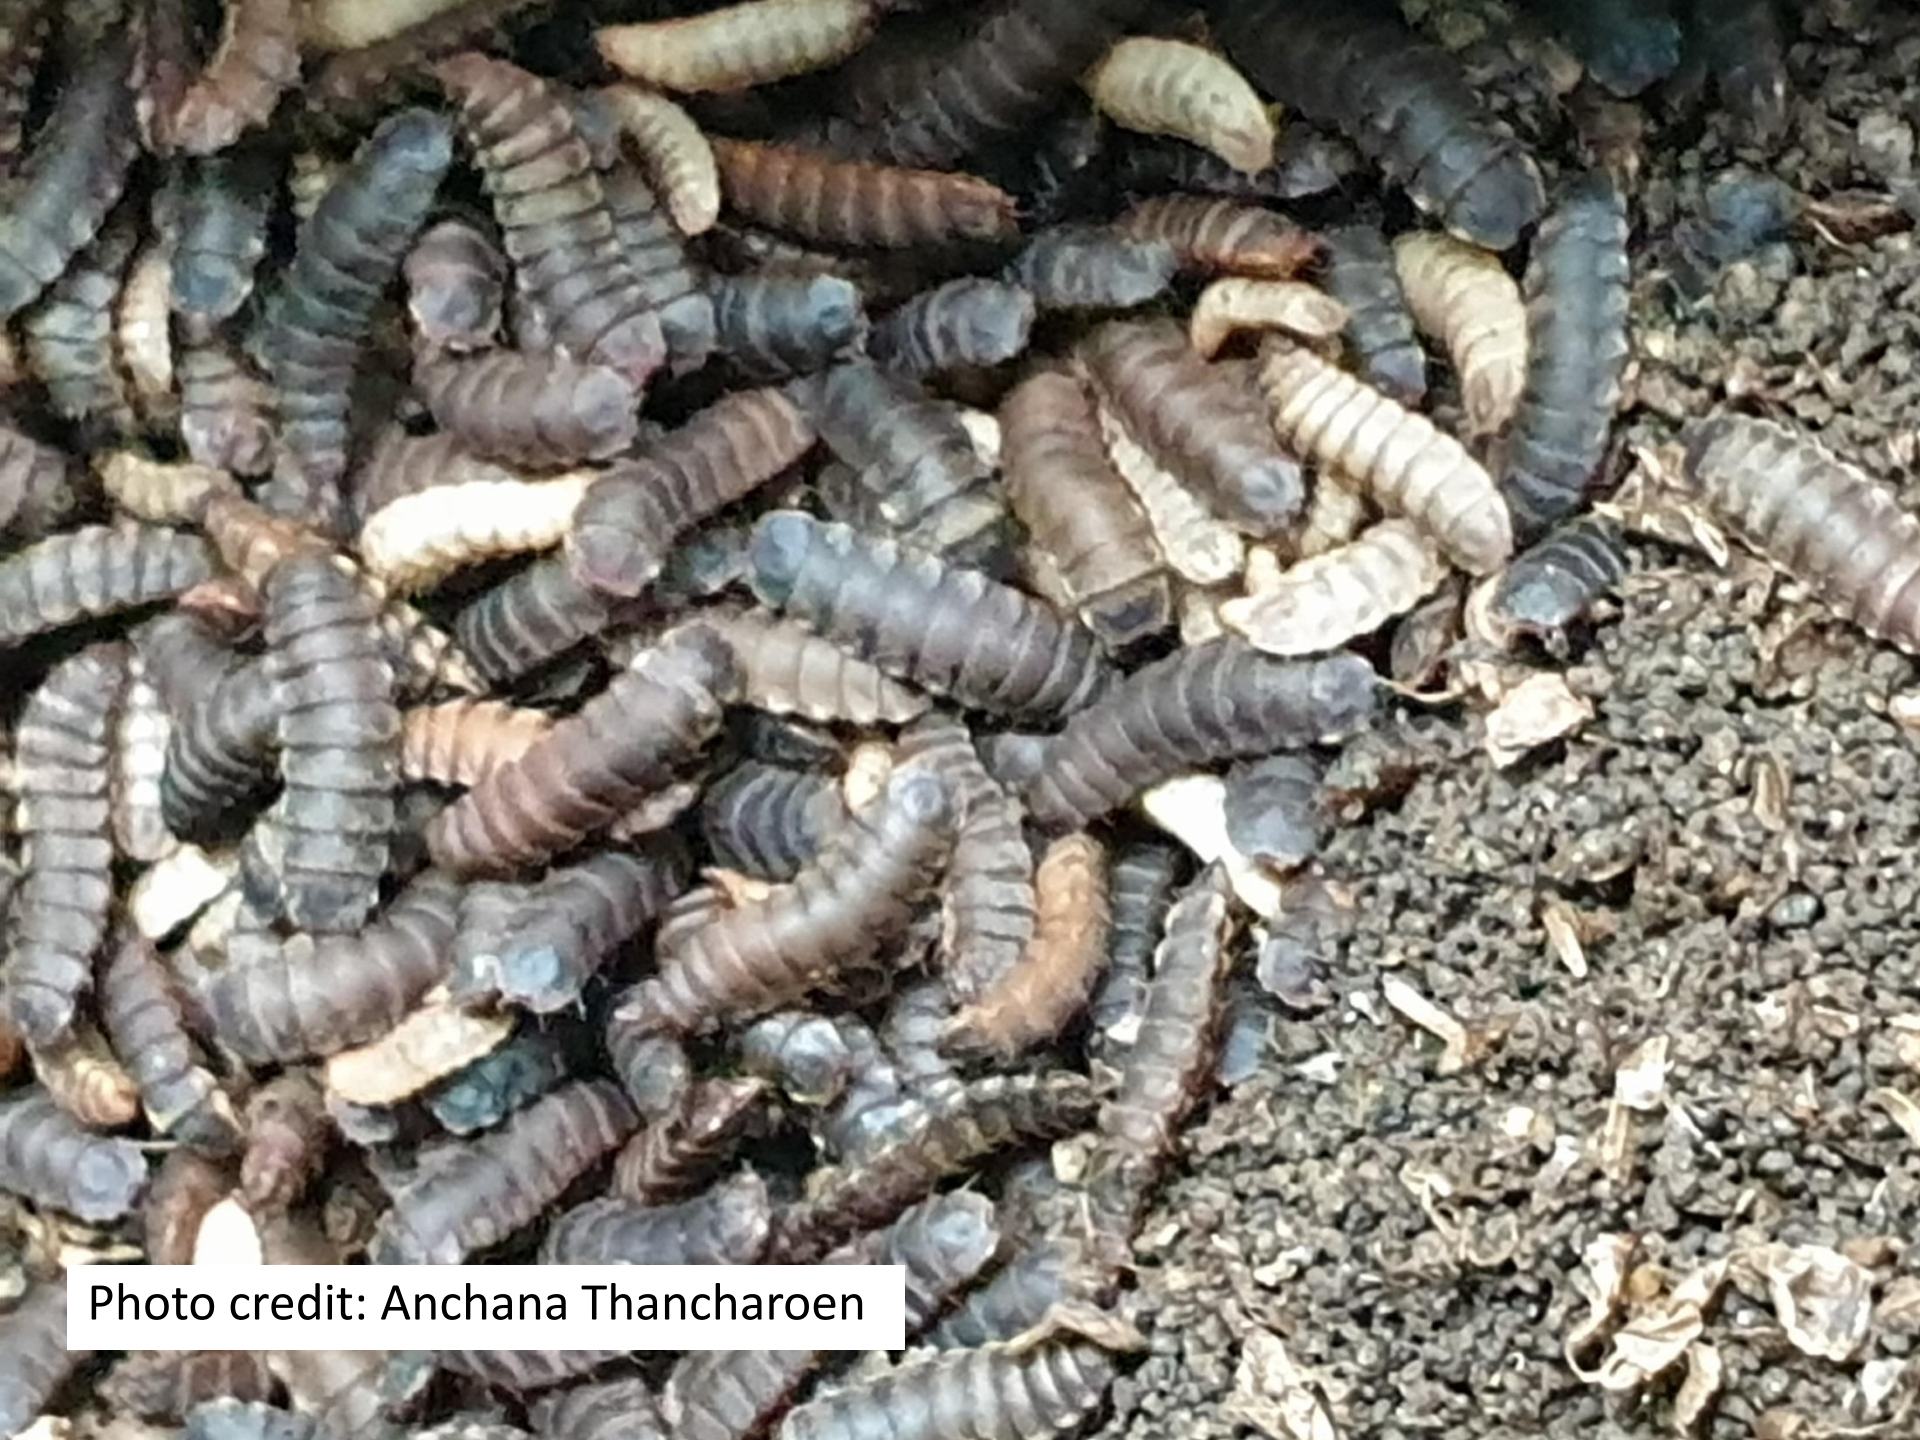

Photo credit: Anchana Thanchaen

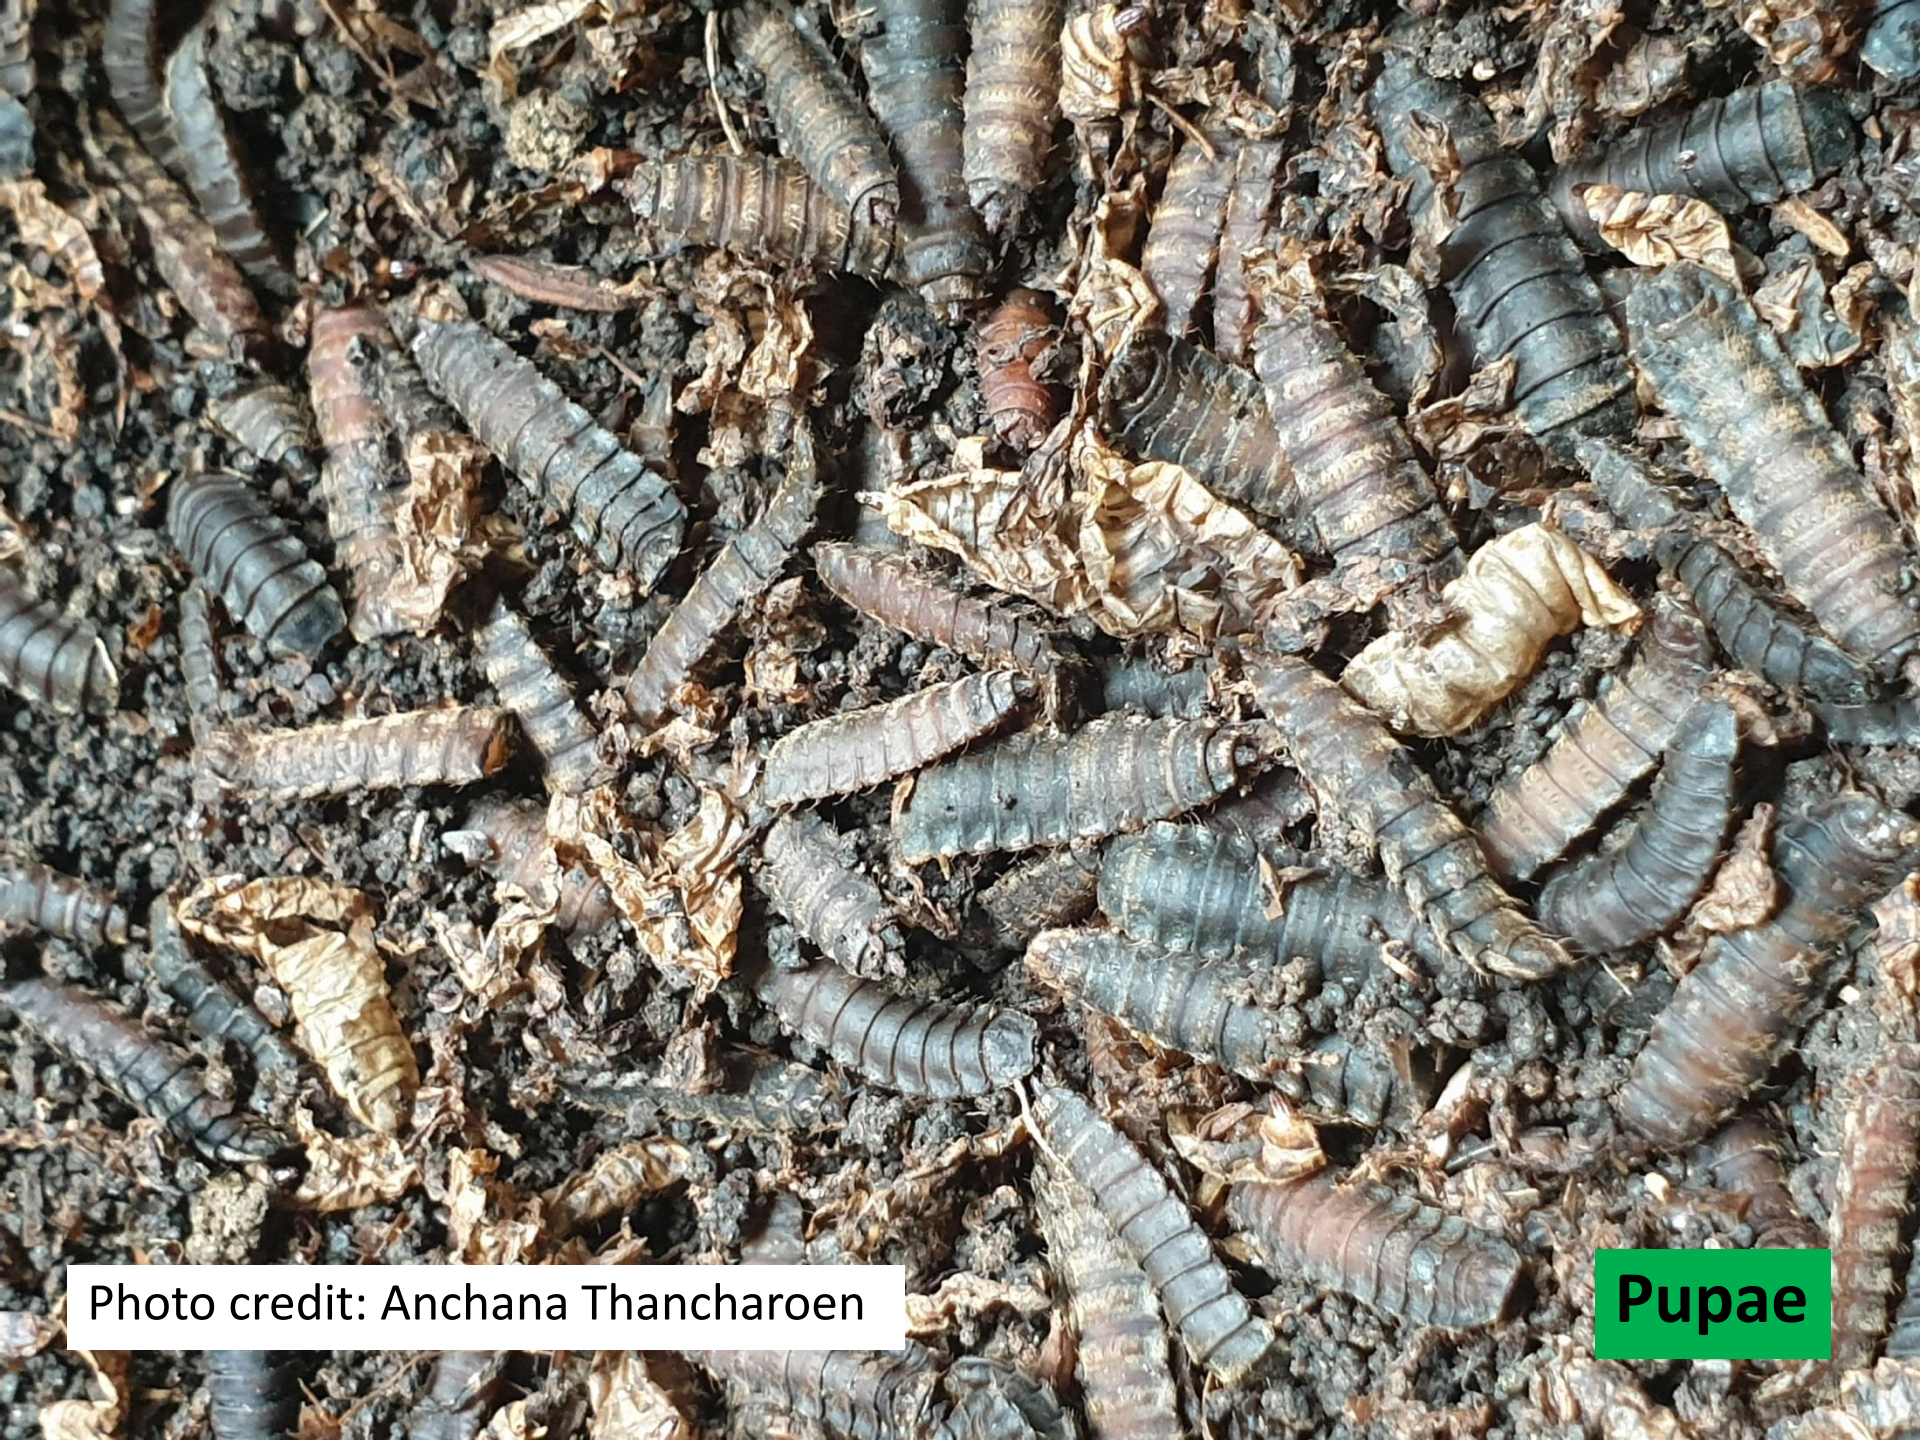

Photo credit: Anchana Thanchaen

**Pupae**
